# Supplementary material for: Uptight responses between clenching and forearm raising with factors of visual feedback and maintenance effort in healthy young women: An experimental study on factorial design
Source: BMC Oral Health. 2023 Feb 14;23:98. doi: 10.1186/s12903-023-02767-9 (PMC9926863; doi:10.1186/s12903-023-02767-9)
Supplement: Supplementary file 2 — Additional file 2. Raw data of VAS. [file 12903_2023_2767_MOESM2_ESM.xlsx]

## Sheet: Sheet1
																													Supplementary Table1 Raw data of VAS
					Clenching Low force Difficulty VAS				Clenching Medium force Difficulty VAS				Clenching Maximum force Difficulty VAS				Forearm raising Low force Difficulty VAS				Forearm raising Medium force Difficulty VAS				Forearm raising Maximum force Difficulty VAS				Clenching Low force Uptight response VAS				Clenching Medium force Uptight response VAS				Clenching Maximum force Uptight response VAS				Forearm raising Low force Uptight response VAS				Forearm raising Medium force Uptight response VAS				Forearm raising Medium force Uptight response VAS
name	age	height cm	weight kg	Length of upper limb cm	No visual feedback, NO maintenance	Visual feedback, NO maintenance	No visual feedback, Maintenance	Visual feedback, Maintenance	No visual feedback, NO maintenance	Visual feedback, NO maintenance	No visual feedback, Maintenance	Visual feedback, Maintenance	No visual feedback, NO maintenance	Visual feedback, NO maintenance	No visual feedback, Maintenance	Visual feedback, Maintenance	No visual feedback, NO maintenance	Visual feedback, NO maintenance	No visual feedback, Maintenance	Visual feedback, Maintenance	No visual feedback, NO maintenance	Visual feedback, NO maintenance	No visual feedback, Maintenance	Visual feedback, Maintenance	No visual feedback, NO maintenance	Visual feedback, NO maintenance	No visual feedback, Maintenance	Visual feedback, Maintenance	No visual feedback, NO maintenance	Visual feedback, NO maintenance	No visual feedback, Maintenance	Visual feedback, Maintenance	No visual feedback, NO maintenance	Visual feedback, NO maintenance	No visual feedback, Maintenance	Visual feedback, Maintenance	No visual feedback, NO maintenance	Visual feedback, NO maintenance	No visual feedback, Maintenance	Visual feedback, Maintenance	No visual feedback, NO maintenance	Visual feedback, NO maintenance	No visual feedback, Maintenance	Visual feedback, Maintenance	No visual feedback, NO maintenance	Visual feedback, NO maintenance	No visual feedback, Maintenance	Visual feedback, Maintenance	No visual feedback, NO maintenance
Lijuan Zhou	28	163	50	52	0.8	2.4	1.4	3.3	1.7	3.3	3.6	4.6	1.3	1.4	2.2	3.5	1.2	2.3	2.8	3.7	1.7	2.6	2.5	3.4	1.6	2.3	3.2	4.2	0.7	1.5	1.3	2.8	1.3	2.3	2.4	2.8	0.8	0.8	1.4	3.3	1.2	1.5	2.2	2.7	1.2	1.8	1.7	2.6	1.2
Lei Lu	28	163.5	49	52	4.5	4.8	5.8	1.6	4.6	2.6	3.9	2.5	4.6	4.8	2.8	3.4	0.7	2.3	3.4	2.8	2.3	2.2	4.5	2.4	3.5	4.3	3.5	3.5	0.5	0.7	1.2	0.2	0.7	0.6	0.6	0.7	1.2	0.8	0.5	0.6	0.5	0.6	0.4	0.3	0.6	0.5	1.4	1.4	0.8
Hengli Yang	36	159	50.5	52.2	2	9	4.5	2.7	2.9	1.9	4	1.9	1	4.9	1	1.1	1.6	1.1	2.9	3.2	0.7	8.8	4.8	5.9	0.7	2.8	6.9	6.2	3	6.9	3.8	2.8	3.2	0.9	3.1	a	0.6	3.8	0.6	1.1	2.8	1.5	2.1	2	0.8	2.8	2.8	3.8	0.4
Qi Deng	24	162	46.5	52	0.5	2	1.9	1.8	0.4	1.8	2.3	2.3	0.2	1.6	0.8	0.5	0.2	2.4	1.4	2.4	0.4	1.7	0.9	2	0.3	1.6	0.6	2.4	0.4	2	2	1.3	0.3	1.2	1.7	1.7	0.2	0.7	0.6	0.2	0.2	1.4	0.4	1.3	0.4	0.4	0.4	1	0.8
Xiaoxue Bai	22	167	53	52	1.4	2.5	0.4	1.7	0.6	2.4	2.5	2.6	2.5	2.5	1.5	1.7	1.4	3.3	2.8	1.8	1.4	1.6	1.7	2.5	1.7	2.2	2.7	2.9	0.8	0.5	0.5	1.9	0.6	1.2	1.5	2.4	1.6	2.6	1.9	1.7	1.4	2.4	2.9	2.6	2.7	2.6	1.8	1.5	2.8
Lifan Liao	29	163	52	53.5	6	8.3	5.2	6.2	6.5	7.4	5.2	4.7	3.8	5.4	3.4	2.7	4.8	5.7	4.3	3.6	4.7	6.3	5.3	6.5	3.6	5.3	7.5	5.6	4	7.3	5.2	6.3	6.3	7.2	4.7	4.4	3.6	5.2	3.3	4.3	4.6	5.5	3.7	3.7	4.6	5.8	4.6	6.3	2.6
Ting Dong	21	163	50	51	3.3	5.5	7.5	2.5	2.4	6.5	6.9	4.5	1.6	3.7	3.3	5.4	1.7	4.4	3.4	4.6	4.6	4.5	3.8	4.7	2.4	4.2	2.4	3.6	4.5	1.4	3.6	1.6	1.4	2.9	3.6	2.8	1.7	2.5	2.5	2.8	1.5	1.8	2.4	2.6	2.2	2.2	2.5	2.4	1.7
Zhiyao Lu	26	163	50	53	1	4.5	1.5	2.5	0.4	1.5	3.5	1.4	0.6	3.5	0.5	1.5	0.5	1.5	2.5	2.5	0.6	3.6	2.5	3.6	1.5	3.6	2.4	1.6	1	1.5	1.5	0.6	0.5	0.6	1.5	0.5	0.6	1.5	0.6	0.6	0.6	0.6	1.5	0.6	0.5	1.4	1.4	1.6	0.5
Yuanyuan Ren	24	160	44	49.5	0.5	4.4	1.4	2.4	0.5	2.6	1.5	2.5	0.6	1.5	0.4	0.6	0.6	1.6	0.7	2.4	1.4	2.5	2.5	2.5	0.7	1.8	1.7	1.6	0.5	6.4	1.5	2.4	0.4	2.5	1.4	2.6	0.5	1.5	0.6	0.5	0.5	1.6	0.6	2.5	1.6	2.5	2.4	2.6	0.6
Xiaoxiao Li	25	165	54	51.5	0.5	8.8	2.6	9.5	7.5	7.6	8.4	7.5	1.5	2.5	2.5	1.6	3.6	4.6	2.4	1.5	1.6	6.6	2.5	3.6	2.6	5.6	3.6	3.5	0.3	9.3	3.6	9.7	8.6	8.7	9.5	8.4	2.6	3.5	3.6	2.6	4.6	6.5	3.6	2.6	2.7	8.5	4.4	5.6	3.6
Xiaomei Xu	21	164	54	51.6	2.5	2.5	3.6	2.5	1.5	4.5	5.4	0.4	5.4	0.4	0.6	4.5	0.5	4.4	6.5	6.6	2.5	1.5	6.4	3.4	1.5	4.4	7.4	6.4	0.5	2.4	0.5	0.5	0.5	2.5	1.4	0.5	2.5	3.5	3.5	0.4	2.4	2.5	1.5	3.4	4.5	3.6	0.5	1.5	1.4
Chenchen Liang	27	165	70	52	2.5	4.4	5	8	0.6	5	3.6	5	6	5.4	0.5	1	5.5	5	1.6	2	2.5	2.5	3	1.6	3	3	5.5	2.6	0.5	1.6	2.6	3.6	0.5	2.5	3.5	4	3	3	0.5	0.5	2.5	2.5	0.5	0.6	0.6	0.6	1.4	0.6	1.5
Jinglin Zhang	21	163	50	53	0.4	7.5	7.5	4.9	1.5	5.2	5.4	4	1.6	4.9	7.3	7.5	2.2	2.7	5	4.5	2.4	4.3	4.7	4.3	1.9	2.4	5	5.1	0.5	1.4	2	1	1.5	1.4	2	1.5	0.8	2	3.9	3.8	1	1	1.1	1	0.7	1.5	0.9	1	1
Jiaojiao Hao	21	162	50	50	0.4	6.5	0.6	5.5	2.5	3.5	5.5	4.5	0.5	3.6	1.5	2.5	2.5	3.6	4.5	3.6	4.6	3.5	6.6	4.6	3.7	5.5	6.6	5.5	0.4	3.5	0.5	3.6	1.6	2.5	2.5	1.4	0.4	1.5	0.5	1.6	0.6	0.4	0.6	1.5	1.5	2.5	2.7	5.4	3.4
Rong Li	22	160	45	49	0.8	4.5	6.6	8.3	1.6	6.6	7.5	7.7	1.6	2.6	3.3	2.8	3.3	3.5	3.5	3.5	4.5	4.6	5.5	4.7	2.8	3.6	5.5	6.4	0.8	7.5	7.4	9.3	1.3	8.5	8.4	8.5	1.6	2.7	3.6	2.4	3.6	3.3	3.4	3.7	4.4	4.7	5.6	5.3	3.6
Yifei Xu	30	160	54	51	0.7	6.6	4.4	6.5	0.8	2.6	2.7	4.4	1.5	3.6	1.7	2.2	2.6	5.6	2.7	2.1	3.8	7.7	4.2	5.6	3.5	4.2	3.7	6.3	0.7	2.6	2.4	2.3	0.7	1.5	1.5	2.8	0.8	2.6	2.2	2.2	1.2	2.5	1.8	0.2	2.4	7.7	4.6	6.8	7.5
Yidan Zhang	22	155	57	50.5	1	4	3.1	3.2	0.7	3.1	2.6	1.9	0.5	1.8	0.3	2.2	2.2	2.1	1.7	1.2	0.8	1.6	2.9	2.2	1.3	1.2	1.2	2.1	1	1	1.1	1.5	0.8	2	2.1	1.3	0.6	1.2	0.4	1.7	1.7	0.9	0.9	0.7	0.7	0.8	1.8	1.5	0.9
Xin Yang	36	168	55	53.5	0.5	2.4	1.5	2.5	1.5	1.5	0.5	1.4	0.5	1.6	0.5	0.6	0.5	1.6	1.6	2.6	1.5	1.6	2.5	1.6	0.6	0.5	2.5	2.4	0.5	2.5	1.5	2.5	1.5	1.5	0.5	1.4	0.5	1.5	0.5	1.5	0.7	2.5	2.7	2.4	1.5	1.6	3.4	2.7	2.5
Nana Hui	27	158	50	51	1.8	4.8	4.9	3.2	3.4	4.7	3.7	5.7	1.7	1.7	4	2.4	3.8	3.4	4.2	3.7	3.4	4.4	3.7	5.3	1.3	3.5	4.2	4.6	0.4	2.3	3.5	3.4	3.3	3.3	2.3	5.4	2.5	2.5	4.2	2.7	3.5	3.7	3.6	3.8	4	4.4	3.8	4.9	3.4
Meng He	24	158	44	47.5	1.4	2.6	3.5	2.5	3.6	3.7	4.3	2.8	1.6	1.5	1.5	1.5	1.4	2.3	2.4	2.5	3.2	2.6	3.4	2.6	2.6	3.7	3.6	4.7	0.6	2.6	3.7	2.6	3.7	3.7	4.3	2.7	1.6	1.5	1.6	1.6	1.5	2.3	2.5	2.6	3.2	2.6	3.5	2.6	2.6
Ting Yang	29	168	48	55.5	2.4	6.4	5.5	3.6	1.6	2.5	2	2.6	2	1.3	2.7	2.4	2.9	2.1	4	4	3.9	3	2.9	2.8	1.9	3.5	2.9	4	1.3	3.5	2.5	1.4	0.6	0.6	1	1	1	0.4	1.4	1.4	1	0.6	1.9	1.8	2	2	1.4	1.3	0.9
Hongyun Zhang	25	170	65	56.5	2.5	4.5	3.6	2.9	2.3	2.3	3.6	2.5	1.2	2.5	1.2	2.6	0.6	1	1.5	2	0.6	0.5	0.6	0.5	0.4	2	2.1	1.6	0.5	3.3	2.9	1.8	1.2	1.2	2.1	1.5	0.7	1	1	1.4	0.5	0.6	0.6	0.6	0.7	0.6	0.5	0.5	0.5
Xiaona Ning	20	161	56	51.5	3.6	5.4	6.7	5.6	4.7	5.9	6.8	7.9	5.9	6.2	3.9	6.5	3.9	4.8	6.4	6.6	3.4	2.7	5.5	4.8	2.8	7.7	3.9	5.9	1.7	2.7	5.6	4.6	3.8	3.3	4.8	5.9	3.9	5	2.7	4.8	1.9	2.8	5.5	5.8	1.4	0.5	2.7	2.8	1.2
Xinyue Xu	21	161	45	52	2.4	3.3	3.4	2.5	2.4	1.5	2.4	2.5	1.4	1.3	1.3	3.4	1.5	2.5	1.5	1.4	1.4	2.4	2.4	2.5	1.4	2.5	2.5	2.4	1.4	1.5	2.5	2.4	2.4	1.4	1.5	1.4	1.5	1.5	1.4	1.5	1.4	1.4	1.4	1.4	1.5	1.4	1.5	1.4	1.5
Yangyang Zhang	21	165	51	54	1	4.5	6.2	2.5	1.7	2.6	2.7	1.8	1.5	1.8	1.2	1	1.5	1.9	3	2.4	1.6	1.9	3.8	3.8	2.5	2.2	4.2	4.7	1.5	4.4	7.2	1.5	1.3	2.3	2.6	1.6	1.5	1.9	1.3	1	1.4	1.9	2.5	2.5	1.4	1.9	3.4	4	2.2
	4.45346	3.49022	5.99493	1.91658
[truncated: 3 more columns]
