# Supplementary material for: Uptight responses between clenching and forearm raising with factors of visual feedback and maintenance effort in healthy young women: An experimental study on factorial design
Source: BMC Oral Health. 2023 Feb 14;23:98. doi: 10.1186/s12903-023-02767-9 (PMC9926863; doi:10.1186/s12903-023-02767-9)
Supplement: Supplementary file 3 — Additional file 3. Raw data of SEMG. [file 12903_2023_2767_MOESM3_ESM.xls]

## Sheet: Sheet1
							Supplementary Table2 Raw data of SEMG
TAR SEMG					TAL SEMG					MMR SEMG					MML SEMG					bicL SEMG
no visual feedback no maintenance	visual feedback no maintenance	no visual feedback maintenance	visual feedback maintenance		no visual feedback no maintenance	visual feedback no maintenance	no visual feedback maintenance	visual feedback maintenance		no visual feedback no maintenance	visual feedback no maintenance	no visual feedback maintenance	visual feedback maintenance		no visual feedback no maintenance	visual feedback no maintenance	no visual feedback maintenance	visual feedback maintenance		no visual feedback no maintenance	visual feedback no maintenance	no visual feedback maintenance	visual feedback maintenance
Low force peak value TAR SEMG	Low force peak value TAR SEMG	Low force peak value TAR SEMG	Low force peak value TAR SEMG		Low force peak value TAL SEMG	Low force peak value TAL SEMG	Low force peak value TAL SEMG	Low force peak value TAL SEMG		Low force peak value MMR SEMG	Low force peak value MMR SEMG	Low force peak value MMR SEMG	Low force peak value MMR SEMG		Low force peak value MML SEMG	Low force peak value MML SEMG	Low force peak value MML SEMG	Low force peak value MML SEMG		Low force peak value bicL SEMG	Low force peak value bicL SEMG	Low force peak value bicL SEMG	Low force peak value bicL SEMG
2	6	6	8		2	6	4	13		2	18	13	36		3	22	17	22		23	61	34	37
2	37	47	20		4	10	12	11		15	15	24	4		32	84	102	74		5	39	37	21
8	23	39	29		12	26	35	39		20	60	32	25		10	33	44	23		32	40	22	28
15	36	22	4		11	61	28	8		14	11	6	10		15	10	14	15		32	22	29	23
3	14	2	4		3	12	6	6		3	51	15	25		4	25	12	14		8	130	72	65
22	49	4	35		34	36	12	67		40	33	60	29		25	18	13	17		14	6	6	6
5	8	4	5		3	3	4	4		5	16	12	17		4	18	14	13		24	63	27	21
5	5	8	9		9	11	8	15		11	5	5	11		20	10	6	37		19	10	48	83
32	14	8	20		7	24	7	16		29	79	54	104		13	55	33	50		4	15	26	23
6	12	7	8		8	14	4	8		10	11	12	7		4	8	4	3		10	10	9	8
4	6	7	6		3	5	7	20		10	10	37	21		6	10	49	37		48	6	20	9
13	5	4	3		11	12	7	9		8	26	24	41		17	51	28	46		8	18	42	15
29	34	57	39		36	37	38	24		32	52	47	33		69	69	67	68		15	12	46	33
14	3	3	3		14	11	14	32		13	16	5	7		18	8	6	11		64	44	86	40
21	20	33	32		16	12	17	10		33	36	8	19		13	16	10	12		193	189	35	21
12	11	29	19		7	16	19	19		5	8	20	29		23	31	28	34		31	55	37	51
7	8	15	10		5	5	8	8		5	13	23	15		4	10	16	13		60	35	180	101
27	7	35	28		13	7	14	19		46	7	12	23		71	7	65	68		50	42	46	31
Medium force peak value TAR SEMG	Medium force peak value TAR SEMG	Medium force peak value TAR SEMG	Medium force peak value TAR SEMG		Medium force peak value TAL SEMG	Medium force peak value TAL SEMG	Medium force peak value TAL SEMG	Medium force peak value TAL SEMG		Medium force peak value MMR SEMG	Medium force peak value MMR SEMG	Medium force peak value MMR SEMG	Medium force peak value MMR SEMG		Medium force peak value MML SEMG	Medium force peak value MML SEMG	Medium force peak value MML SEMG	Medium force peak value MML SEMG		Medium force peak value bicL SEMG	Medium force peak value bicL SEMG	Medium force peak value bicL SEMG	Medium force peak value bicL SEMG
7	36	17	25		8	29	9	22		11	52	34	35		17	68	39	31		59	64	38	42
26	108	113	126		25	47	79	85		33	70	52	64		27	161	90	92		111	218	138	176
24	68	48	47		48	44	37	51		69	98	103	66		40	110	59	48		53	49	17	22
36	30	54	24		41	15	37	46		18	11	17	11		19	12	15	14		8	10	52	93
9	116	33	66		27	153	73	65		12	85	61	39		21	123	67	64		274	171	118	112
4	68	35	8		6	41	60	62		22	53	57	69		11	34	14	26		6	18	17	22
6	14	27	14		3	5	5	5		4	9	34	31		6	16	49	17		29	45	24	21
39	92	68	71		35	91	62	62		79	61	53	52		60	99	67	76		107	152	122	92
3	115	145	161		2	114	51	74		8	127	113	122		13	110	120	126		20	53	29	59
15	11	36	32		12	19	29	30		13	10	12	14		5	14	6	8		9	9	10	9
14	8	19	8		22	13	14	9		42	13	34	28		46	12	36	29		18	42	17	8
7	12	15	17		11	20	12	20		19	55	25	70		35	52	27	149		38	75	35	46
49	57	84	77		62	56	54	43		67	46	69	64		67	77	53	55		42	17	43	46
4	4	8	21		26	25	29	43		32	33	28	13		23	35	28	21		100	110	57	59
16	27	63	81		7	8	58	46		16	22	18	17		12	18	27	26		27	47	28	52
13	14	43	47		12	8	36	35		6	15	28	62		18	33	59	64		41	46	29	46
65	150	75	135		40	56	67	83		76	36	55	73		63	46	62	89		146	175	53	126
18	17	78	63		17	12	40	29		26	25	97	67		31	25	107	97		63	52	103	46
Maximum force peak value TAR SEMG	Maximum force peak value TAR SEMG	Maximum force peak value TAR SEMG	Maximum force peak value TAR SEMG		Maximum force peak value TAL SEMG	Maximum force peak value TAL SEMG	Maximum force peak value TAL SEMG	Maximum force peak value TAL SEMG		Maximum force peak value MMR SEMG	Maximum force peak value MMR SEMG	Maximum force peak value MMR SEMG	Maximum force peak value MMR SEMG		Maximum force peak value MML SEMG	Maximum force peak value MML SEMG	Maximum force peak value MML SEMG	Maximum force peak value MML SEMG		Maximum force peak value bicL SEMG	Maximum force peak value bicL SEMG	Maximum force peak value bicL SEMG	Maximum force peak value bicL SEMG
5	63	87	74		2	53	66	73		8	130	147	161		17	112	114	103		101	74	71	29
94	283	231	282		113	177	167	278		81	151	189	144		108	224	166	225		169	171	328	203
8	35	108	171		4	26	200	278		11	97	166	271		13	38	121	160		63	44	55	53
57	81	120	121		44	85	104	81		21	36	35	63		27	42	55	69		147	213	201	212
13	198	114	118		13	236	116	219		7	255	104	130		12	174	107	132		161	205	149	271
56	104	197	142		45	75	137	137		37	121	111	160		61	89	102	129		26	16	23	16
5	37	88	133		4	65	77	99		5	31	47	113		7	52	102	162		41	21	32	32
50	13	212	185		69	10	165	114		57	11	187	115		77	12	206	152		329	185	206	291
239	135	215	226		121	48	150	129		108	85	139	210		183	140	302	277		33	63	119	52
42	25	94	45		43	35	112	72		32	26	70	38		43	38	56	30		37	63	89	40
24	5	43	46		57	9	58	113		92	11	93	144		169	17	132	171		24	22	27	30
45	50	71	90		59	57	67	57		264	227	207	162		125	160	234	133		86	44	77	34
110	121	213	109		129	188	163	128		221	195	192	209		268	282	173	179		127	126	101	57
41	35	46	106		41	34	56	100		41	31	46	123		57	29	28	180		59	59	28	35
101	96	141	95		63	99	106	65		85	85	85	63		89	85	111	83		89	81	40	93
31	81	72	101		24	125	73	109		44	96	94	200		46	103	158	132		66	55	66	37
179	44	132	152		60	28	164	189		58	14	58	61		78	24	103	112		114	99	85	79
14	4	84	108		14	5	81	73		28	10	133	175		59	13	163	117		81	132	56	73
